# Supplementary material for: Biological nanoparticles carrying the Hmda-7 gene are effective in inhibiting pancreatic cancer in vitro and in vivo
Source: PLoS One. 2017 Oct 6;12(10):e0185507. doi: 10.1371/journal.pone.0185507 (PMC5630125; doi:10.1371/journal.pone.0185507)

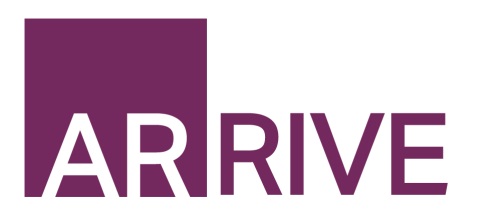


The ARRIVE Guidelines Checklist

Animal Research: Reporting In Vivo Experiments

Carol Kilkenny1, William J Browne2, Innes C Cuthill3, Michael Emerson4 and Douglas G Altman5

*1The National Centre for the Replacement, Refinement and Reduction of Animals in Research, London, UK, 2School of Veterinary Science, University of Bristol, Bristol, UK, 3School of Biological Sciences, University of Bristol, Bristol, UK, 4National Heart and Lung Institute, Imperial College London, UK, 5Centre for Statistics in Medicine, University of Oxford, Oxford, UK.*

|  | | ITEM | RECOMMENDATION | Section/ Paragraph |
| --- | --- | --- | --- | --- |
| 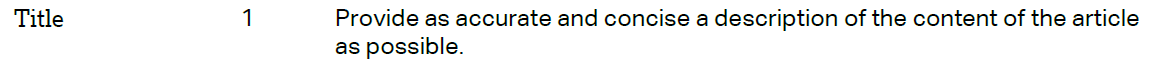 | | | Title, Paragraph 1 |
| 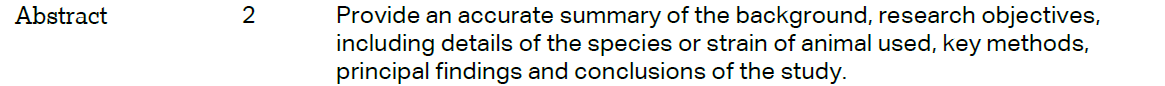 | | | Abstract, paragraph 1 to paragraph 4 |
| INTRODUCTION | | |  |
| 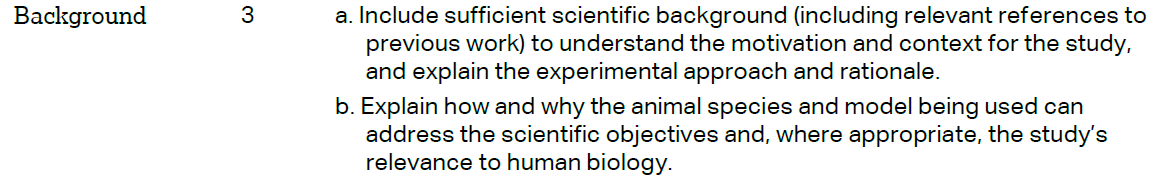 | | | Introduction, paragraph 1 to paragraph 3 |
| 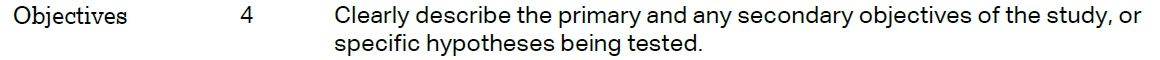 | | | Introduction, paragraph 4 |
| METHODS | | |  |
| 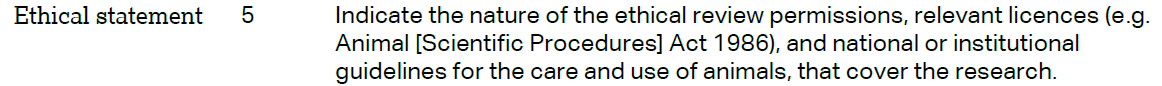 | | | Material and Methods, paragraph 7 |
| 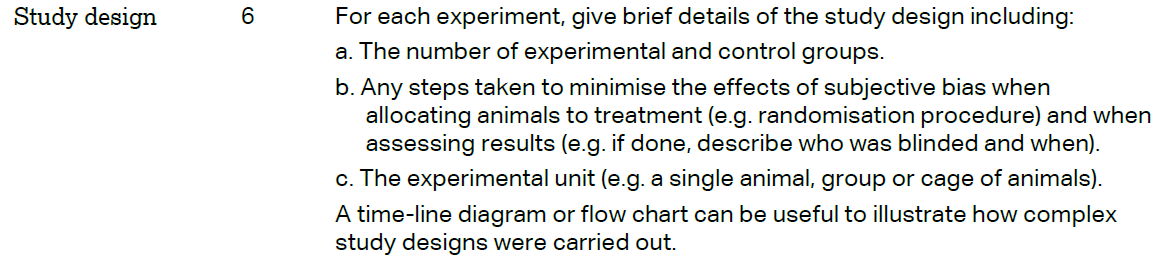 | | | Material and Methods, paragraph 7 to  paragraph 9 |
| 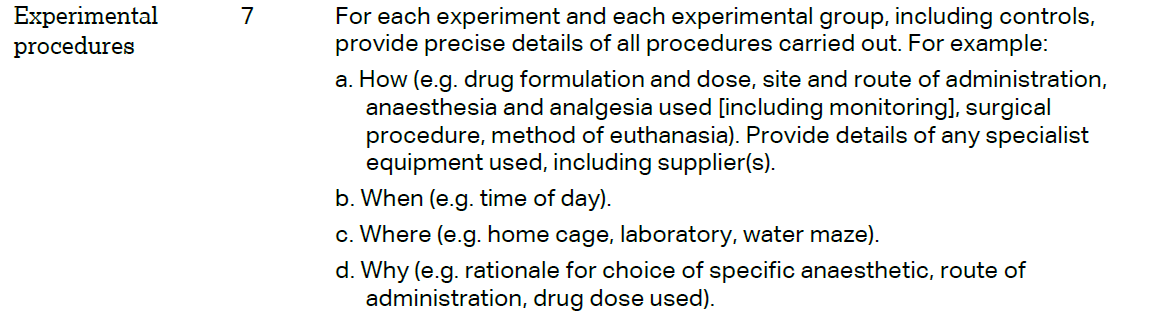 | | | Material and Methods, paragraph 7 to  paragraph 9 |
| 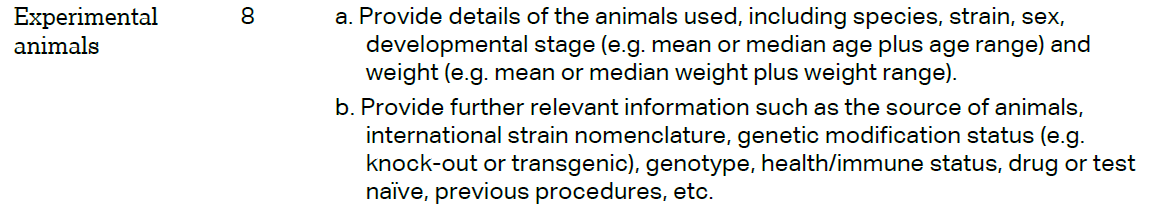 | | | Material and Methods, paragraph 7 to  paragraph 9 |

The ARRIVE guidelines. Originally published in *PLoS Biology*, June 20101

| 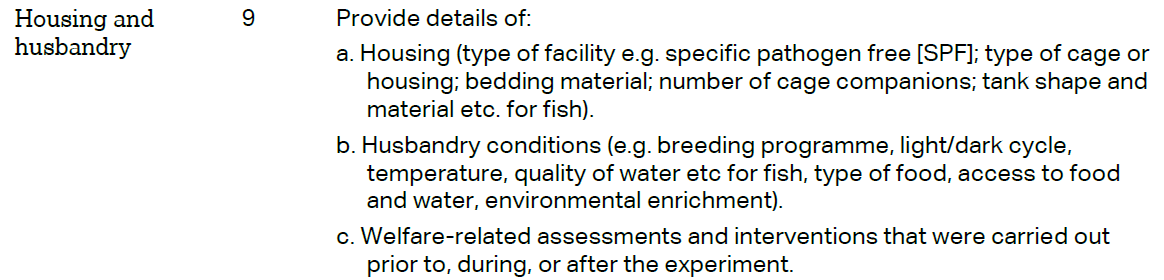 | Material and Methods, paragraph 7 |
| --- | --- |
| 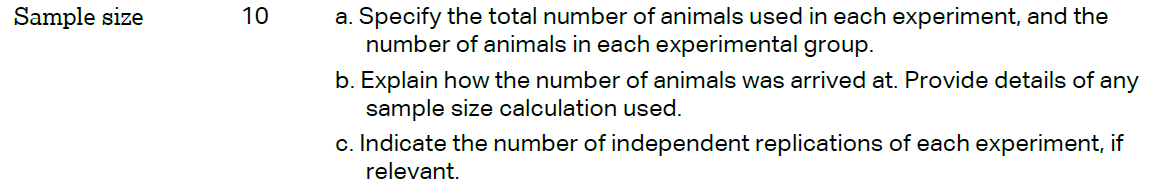 | Material and Methods, paragraph 8 |
| 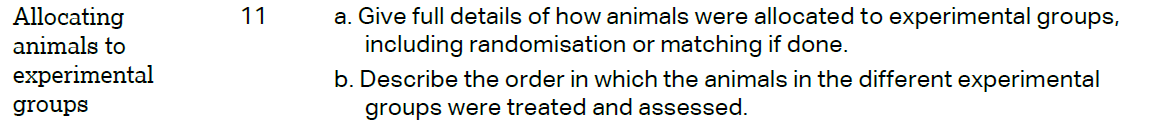 | Material and Methods, paragraph 8 to  paragraph 9 |
| 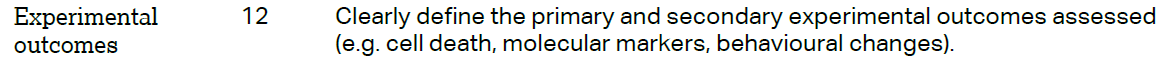 | Material and Methods, paragraph 9 to  paragraph 11 |
| 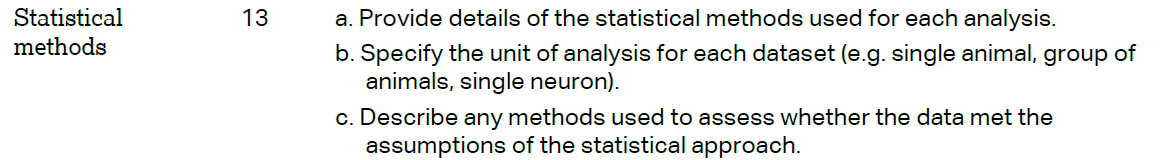 | Material and Methods, paragraph 12 |
| RESULTS |  |
| 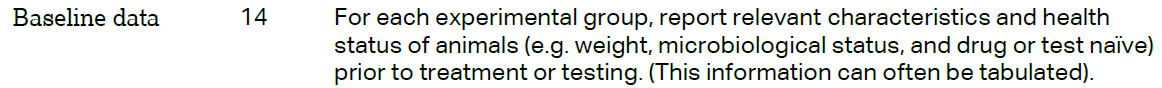 | Results, paragraph 4 |
| 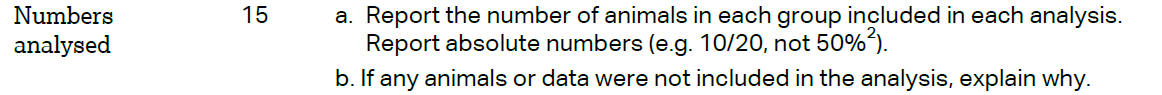 | Results, paragraph 4 |
| 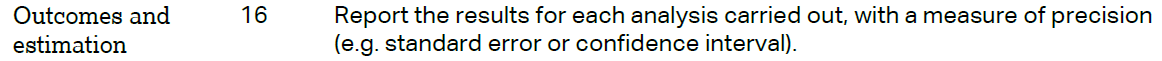 | Results, paragraph 4 |
| 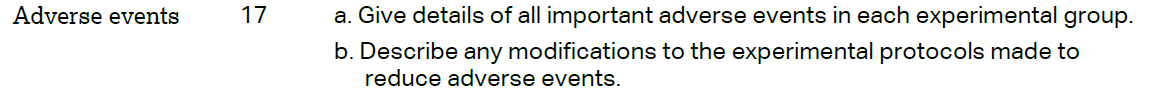 | Results, paragraph 4 |
| DISCUSSION |  |
| 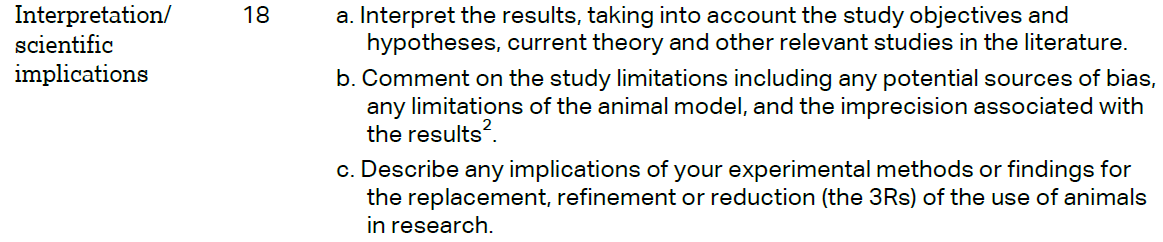 | Discussion, paragraph 1 to paragraph 4 |
| 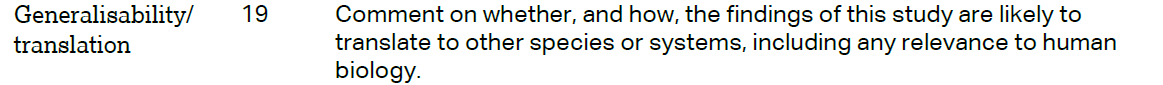 | Discussion,paragraph 4 |
| 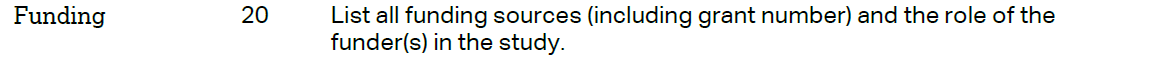 | | Author Contributions, paragraph 1 | |


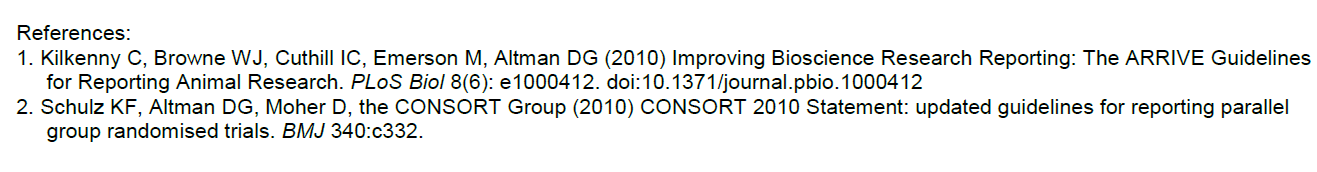

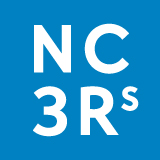

Supplement: S1 File — (DOCX) [file pone.0185507.s001.docx]
